# Supplementary material for: Superior Corrosion Inhibition Activity of CaO Nanoparticles Synthesized from Natural Sources toward Grade 202 Stainless-steel in Chloride-rich Media
Source: Research Square preprint supplement (doi:10.21203/rs.3.rs-7479462/v1), 2025-10-14
Supplement: Supplementary file 1 [file c74644358cb4a05e4ec4a5c0.docx]

**Highlights**

- Limestone-derived CaO depicts greater effectiveness in corrosion inhibition.
- CaO sourced from clamshells also offers reliable corrosion protection in acidic conditions.
- CaO forms a protective coating on the metal surface, thereby improving the passivation effect.
- Natural materials positions CaO as a sustainable option for corrosion inhibition.
